# Supplementary material for: Binding free energy predictions of farnesoid X receptor (FXR) agonists using a linear interaction energy (LIE) approach with reliability estimation: application to the D3R Grand Challenge 2
Source: PubMed Central journal article supplement (PMC5767202; doi:10.1007/s10822-017-0055-0), 2017-09-09
Supplement: 10822_2017_55_MOESM1_ESM.pdf [file 10822_2017_55_MOESM1_ESM.pdf]

## SUPPLEMENTARY MATERIAL of the manuscript

Binding free energy predictions of Farnesoid X receptor (FXR) agonists using a Linear Interaction Energy (LIE) approach with reliability estimation: application to the D3R Grand Challenge 2

by: Eko Aditya Rifai, Marc van Dijk, Nico P.E. Vermeulen, and Daan P. Geerke

**Table S1.** Dataset of 46 FXR ligands obtained from literature for training of LIE models for the benzimidazole, isoxazole and sulfonamide classes of compounds. Listed are the ligand ID used throughout the current work; ChEMBL IDs of the ligands; literature references (Ref.) from which IC50 values were retrieved to obtain the experimentally observed FXR binding free energy  $\Delta G_{\text{obs}}$  (in  $\text{kJ mol}^{-1}$ ), calculated as  $\Delta G_{\text{obs}} = RT \ln (\text{IC}_{50}/2)$ ; the predicted binding free energy ( $\Delta G_{\text{pred}}$ ) in  $\text{kJ mol}^{-1}$ ; and differences  $\Delta G_{\text{obs}} - \Delta G_{\text{pred}}$  (Diff., in  $\text{kJ mol}^{-1}$ ).

| Compound class | ID | ChEMBL ID     | Ref. | $\Delta G_{\text{obs}}$ | $\Delta G_{\text{pred}}$ | Diff. |
|----------------|----|---------------|------|-------------------------|--------------------------|-------|
| Benzimidazoles | 1  | CHEMBL1642356 | [5]  | -33.1                   | -35.1                    | 2.0   |
|                | 2  | CHEMBL1642359 | [5]  | -32.2                   | -37.7                    | 5.5   |
|                | 3  | CHEMBL1642358 | [5]  | -38.3                   | -42.6                    | 4.3   |
|                | 4  | CHEMBL1642346 | [5]  | -42.9                   | -37.6                    | -5.3  |
|                | 5  | CHEMBL1642350 | [5]  | -36.5                   | -41.1                    | 4.6   |
|                | 6  | CHEMBL1642354 | [5]  | -41.0                   | -39.2                    | -1.8  |
|                | 7  | CHEMBL1642347 | [5]  | -35.7                   | -35.4                    | -0.3  |
|                | 8  | CHEMBL1668262 | [15] | -39.4                   | -40.3                    | 0.9   |
|                | 9  | CHEMBL1668242 | [15] | -35.6                   | -38.1                    | 2.5   |
|                | 10 | CHEMBL1668247 | [15] | -43.3                   | -39.0                    | -4.3  |
|                | 11 | CHEMBL1668256 | [15] | -33.4                   | -38.9                    | 5.5   |

|              |    |               |      |       |       |      |
|--------------|----|---------------|------|-------|-------|------|
|              | 12 | CHEMBL1668254 | [15] | -40.3 | -38.6 | -1.7 |
|              | 13 | CHEMBL1668253 | [15] | -42.3 | -42.0 | -0.3 |
|              | 14 | CHEMBL1668240 | [15] | -37.5 | -36.3 | -1.2 |
|              | 15 | CHEMBL1668244 | [15] | -48.3 | -41.5 | -6.8 |
|              | 16 | CHEMBL1668259 | [15] | -47.8 | -43.8 | -4.0 |
|              | 17 | CHEMBL1668258 | [15] | -44.3 | -41.7 | -2.7 |
|              | 18 | CHEMBL1615154 | [15] | -50.1 | -45.5 | -4.6 |
|              | 19 | CHEMBL1668248 | [15] | -47.1 | -48.5 | 1.4  |
|              | 20 | CHEMBL1668245 | [15] | -37.0 | -44.1 | 7.0  |
|              | 21 | CHEMBL1668260 | [15] | -35.0 | -34.1 | -0.9 |
|              | 22 | CHEMBL1668261 | [15] | -40.2 | -40.3 | 0.2  |
| Isoxazoles   | 1  | CHEMBL511389  | [16] | -39.9 | -36.3 | -3.6 |
|              | 2  | CHEMBL511559  | [16] | -32.7 | -34.6 | 1.9  |
|              | 3  | CHEMBL466880  | [16] | -33.7 | -37.1 | 3.3  |
|              | 4  | CHEMBL466471  | [16] | -34.9 | -39.2 | 4.3  |
|              | 5  | CHEMBL513149  | [16] | -36.0 | -37.6 | 1.6  |
|              | 6  | CHEMBL466523  | [16] | -44.0 | -39.4 | -4.7 |
|              | 7  | CHEMBL466323  | [16] | -42.2 | -41.4 | -0.8 |
|              | 8  | CHEMBL466887  | [16] | -39.2 | -40.8 | 1.6  |
|              | 9  | CHEMBL466318  | [16] | -40.7 | -38.0 | -2.7 |
|              | 10 | CHEMBL469135  | [16] | -37.2 | -38.8 | 1.6  |
|              | 11 | CHEMBL466315  | [16] | -39.7 | -37.2 | -2.5 |
| Sulfonamides | 1  | CHEMBL1367639 | [17] | -43.9 | -41.6 | -2.3 |
|              | 2  | CHEMBL3264627 | [17] | -36.3 | -40.6 | 4.3  |
|              | 3  | CHEMBL3264635 | [17] | -45.6 | -40.9 | -4.7 |
|              | 4  | CHEMBL3264639 | [17] | -46.4 | -45.4 | -1.0 |
|              | 5  | CHEMBL3264640 | [17] | -43.8 | -42.6 | -1.2 |
|              | 6  | CHEMBL3264642 | [17] | -47.7 | -45.4 | -2.4 |
|              | 7  | CHEMBL3264644 | [17] | -48.5 | -46.4 | -2.1 |
|              | 8  | CHEMBL3264645 | [17] | -46.3 | -45.2 | -1.0 |
|              | 9  | CHEMBL3264646 | [17] | -41.4 | -42.8 | 1.5  |
|              | 10 | CHEMBL3264648 | [17] | -40.9 | -44.9 | 4.0  |
|              | 11 | CHEMBL3264650 | [17] | -42.7 | -43.7 | 1.0  |
|              | 12 | CHEMBL3264651 | [17] | -45.0 | -43.3 | -1.7 |
|              | 13 | CHEMBL3264987 | [17] | -38.6 | -44.2 | 5.6  |

**Table S2.** Dataset of 30 FXR ligands obtained from literature for testing the LIE models for the benzimidazole, isoxazole and sulfonamide classes of compounds, and of 60 FXR ligands of the D3R GC2 ligand set. Listed are the ligand ID used throughout the current work; ChEMBL or D3R (FXR) IDs of the ligands; literature references (Ref.) from which IC<sub>50</sub> values were retrieved to obtain the experimentally observed FXR binding free energy  $\Delta G_{\text{obs}}$  (in kJ mol<sup>-1</sup>), calculated as  $\Delta G_{\text{obs}} = RT \ln (\text{IC}_{50}/2)$ ; the predicted binding free energy ( $\Delta G_{\text{pred}}$ ) in kJ mol<sup>-1</sup>; differences  $\Delta G_{\text{obs}} - \Delta G_{\text{pred}}$  (Diff., in kJ mol<sup>-1</sup>); the violations for each of the 5 AD criteria (1 for violated and 0 for non-violated); and the total CI score per prediction.

| Compound class         | ID | ChEMBL/FXR ID | Ref. | $\Delta G_{\text{obs}}$ | $\Delta G_{\text{pred}}$ | Diff. | AD criteria |   |   |   |   | CI score |
|------------------------|----|---------------|------|-------------------------|--------------------------|-------|-------------|---|---|---|---|----------|
|                        |    |               |      |                         |                          |       | 1           | 2 | 3 | 4 | 5 |          |
| <b>Literature test</b> |    |               |      |                         |                          |       |             |   |   |   |   |          |
| Benzimidazole          | 1  | CHEMBL1642355 | [5]  | -33.8                   | -33.8                    | 0.0   | 0           | 0 | 0 | 0 | 0 | 0        |
|                        | 2  | CHEMBL1642360 | [5]  | -31.9                   | -43.1                    | 11.2  | 0           | 0 | 0 | 0 | 1 | 1        |
|                        | 3  | CHEMBL1642361 | [5]  | -31.7                   | -38.6                    | 6.9   | 0           | 0 | 0 | 1 | 0 | 1        |
|                        | 4  | CHEMBL1642351 | [5]  | -32.9                   | -37.5                    | 4.5   | 0           | 0 | 0 | 0 | 0 | 0        |
|                        | 5  | CHEMBL1642353 | [5]  | -28.2                   | -37.0                    | 8.8   | 0           | 0 | 0 | 0 | 0 | 0        |
|                        | 6  | CHEMBL1642357 | [5]  | -33.0                   | -38.9                    | 6.0   | 0           | 0 | 0 | 0 | 0 | 0        |
|                        | 7  | CHEMBL1642349 | [5]  | -27.7                   | -36.1                    | 8.4   | 0           | 0 | 0 | 1 | 0 | 1        |
|                        | 8  | CHEMBL1642348 | [5]  | -30.0                   | -38.5                    | 8.6   | 0           | 1 | 0 | 1 | 0 | 2        |
|                        | 9  | CHEMBL1642362 | [15] | -47.1                   | -43.1                    | -4.0  | 0           | 0 | 0 | 0 | 0 | 0        |
|                        | 10 | CHEMBL1668243 | [15] | -48.1                   | -44.2                    | -3.8  | 0           | 0 | 0 | 1 | 0 | 1        |
|                        | 11 | CHEMBL1668241 | [15] | -39.1                   | -37.2                    | -2.0  | 0           | 0 | 0 | 0 | 0 | 0        |
|                        | 12 | CHEMBL1668246 | [15] | -35.4                   | -38.8                    | 3.4   | 0           | 0 | 0 | 1 | 1 | 2        |
|                        | 13 | CHEMBL1668255 | [15] | -40.3                   | -37.0                    | -3.3  | 0           | 0 | 0 | 1 | 1 | 2        |
|                        | 14 | CHEMBL1668251 | [15] | -37.5                   | -37.9                    | 0.4   | 0           | 0 | 0 | 1 | 0 | 1        |
|                        | 15 | CHEMBL1668239 | [15] | -44.3                   | -40.5                    | -3.8  | 0           | 0 | 0 | 0 | 0 | 0        |

|                        |    |               |      |       |       |       |   |   |   |   |   |   |
|------------------------|----|---------------|------|-------|-------|-------|---|---|---|---|---|---|
|                        | 16 | CHEMBL1668238 | [15] | -47.8 | -42.0 | -5.8  | 0 | 0 | 0 | 0 | 0 | 0 |
|                        | 17 | CHEMBL1668250 | [15] | -32.9 | -39.2 | 6.3   | 0 | 0 | 0 | 1 | 1 | 2 |
|                        | 18 | CHEMBL1615150 | [15] | -46.1 | -36.5 | -9.5  | 0 | 0 | 0 | 1 | 1 | 2 |
|                        | 19 | CHEMBL1668257 | [15] | -48.3 | -45.1 | -3.2  | 0 | 0 | 0 | 1 | 1 | 2 |
|                        | 20 | CHEMBL1615152 | [15] | -44.5 | -40.1 | -4.5  | 0 | 0 | 0 | 1 | 0 | 1 |
|                        | 21 | CHEMBL1668249 | [15] | -53.5 | -44.2 | -9.4  | 0 | 0 | 0 | 1 | 1 | 2 |
|                        | 22 | CHEMBL1615153 | [15] | -43.8 | -41.5 | -2.2  | 0 | 0 | 0 | 1 | 1 | 2 |
|                        | 23 | CHEMBL1668252 | [15] | -36.7 | -36.6 | -0.1  | 0 | 0 | 0 | 1 | 1 | 2 |
| Sulfonamide            | 1  | CHEMBL3264637 | [17] | -46.9 | -45.4 | -1.5  | 0 | 0 | 0 | 1 | 0 | 1 |
|                        | 2  | CHEMBL3264638 | [17] | -45.6 | -38.8 | -6.8  | 0 | 0 | 1 | 1 | 1 | 3 |
|                        | 3  | CHEMBL3264641 | [17] | -43.6 | -44.5 | 0.9   | 0 | 0 | 0 | 1 | 1 | 2 |
|                        | 4  | CHEMBL3264643 | [17] | -42.7 | -43.5 | 0.9   | 0 | 0 | 0 | 1 | 0 | 1 |
|                        | 5  | CHEMBL3264647 | [17] | -40.3 | -44.9 | 4.6   | 0 | 0 | 0 | 1 | 1 | 2 |
|                        | 6  | CHEMBL3264649 | [17] | -44.2 | -43.7 | -0.5  | 0 | 0 | 0 | 1 | 0 | 1 |
|                        | 7  | CHEMBL3264988 | [17] | -38.1 | -43.8 | 5.8   | 0 | 0 | 0 | 1 | 1 | 2 |
| <b>D3R predictions</b> |    |               |      |       |       |       |   |   |   |   |   |   |
| Benzimidazole          | 1  | FXR_19        |      | -42.3 | -37.5 | -4.8  | 0 | 0 | 0 | 0 | 0 | 0 |
|                        | 2  | FXR_27        |      | -48.1 | -36.3 | -11.8 | 0 | 0 | 0 | 1 | 0 | 1 |
|                        | 3  | FXR_62        |      | -40.7 | -41.9 | 1.1   | 0 | 0 | 0 | 1 | 1 | 2 |
|                        | 4  | FXR_60        |      | -47.0 | -46.8 | -0.2  | 0 | 1 | 0 | 1 | 1 | 3 |
|                        | 5  | FXR_52        |      | -40.7 | -42.4 | 1.7   | 0 | 0 | 0 | 1 | 0 | 1 |
|                        | 6  | FXR_20        |      | -48.8 | -40.8 | -7.9  | 0 | 0 | 0 | 0 | 0 | 0 |
|                        | 7  | FXR_50        |      | -32.2 | -36.7 | 4.5   | 0 | 0 | 0 | 0 | 0 | 0 |
|                        | 8  | FXR_25        |      | -45.0 | -42.1 | -2.9  | 0 | 0 | 0 | 0 | 0 | 0 |
|                        | 9  | FXR_58        |      | -46.3 | -40.9 | -5.5  | 0 | 0 | 0 | 1 | 1 | 2 |
|                        | 10 | FXR_72        |      | -47.4 | -43.7 | -3.7  | 0 | 0 | 0 | 1 | 1 | 2 |
|                        | 11 | FXR_24        |      | -46.0 | -38.5 | -7.5  | 0 | 0 | 0 | 1 | 1 | 2 |
|                        | 12 | FXR_56        |      | -30.5 | -47.5 | 17.0  | 0 | 0 | 0 | 1 | 1 | 2 |
|                        | 13 | FXR_53        |      | -40.9 | -38.1 | -2.8  | 0 | 0 | 0 | 1 | 0 | 1 |

|    |        |       |       |       |   |   |   |   |   |   |
|----|--------|-------|-------|-------|---|---|---|---|---|---|
| 14 | FXR_59 | -39.3 | -46.0 | 6.7   | 0 | 0 | 0 | 1 | 0 | 1 |
| 15 | FXR_21 | -37.0 | -42.2 | 5.3   | 0 | 0 | 0 | 0 | 0 | 0 |
| 16 | FXR_54 | -36.8 | -39.3 | 2.5   | 0 | 0 | 0 | 0 | 0 | 0 |
| 17 | FXR_61 | -47.5 | -37.5 | -10.0 | 0 | 1 | 0 | 1 | 0 | 2 |
| 18 | FXR_28 | -45.9 | -40.7 | -5.3  | 0 | 1 | 0 | 0 | 1 | 2 |
| 19 | FXR_29 | -44.4 | -42.7 | -1.7  | 0 | 1 | 0 | 1 | 0 | 2 |
| 20 | FXR_71 | -45.0 | -43.5 | -1.5  | 0 | 1 | 0 | 1 | 1 | 3 |
| 21 | FXR_42 | -45.8 | -34.4 | -11.3 | 0 | 0 | 0 | 1 | 0 | 1 |
| 22 | FXR_32 | -43.0 | -33.6 | -9.4  | 0 | 0 | 0 | 1 | 0 | 1 |
| 23 | FXR_22 | -49.8 | -45.4 | -4.5  | 0 | 0 | 0 | 1 | 0 | 1 |
| 24 | FXR_64 | -40.9 | -32.7 | -8.2  | 0 | 0 | 0 | 1 | 0 | 1 |
| 25 | FXR_68 | -26.3 | -36.0 | 9.8   | 0 | 0 | 0 | 1 | 1 | 2 |
| 26 | FXR_69 | -34.6 | -51.4 | 16.7  | 1 | 0 | 1 | 1 | 1 | 4 |
| 27 | FXR_66 | -30.4 | -39.0 | 8.6   | 0 | 0 | 0 | 1 | 1 | 2 |
| 28 | FXR_67 | -29.3 | -40.8 | 11.5  | 0 | 0 | 0 | 1 | 1 | 2 |
| 29 | FXR_31 | -50.0 | -34.1 | -15.9 | 0 | 0 | 0 | 1 | 0 | 1 |
| 30 | FXR_57 | -49.8 | -35.8 | -14.0 | 0 | 0 | 0 | 1 | 0 | 1 |
| 31 | FXR_55 | -58.3 | -38.4 | -19.9 | 0 | 0 | 0 | 1 | 0 | 1 |
| 32 | FXR_26 | -34.7 | -41.9 | 7.2   | 0 | 0 | 0 | 1 | 0 | 1 |
| 33 | FXR_70 | -38.2 | -40.2 | 2.0   | 0 | 0 | 0 | 1 | 0 | 1 |
| 34 | FXR_36 | -45.6 | -43.2 | -2.4  | 0 | 0 | 0 | 1 | 0 | 1 |
| 35 | FXR_63 | -27.9 | -43.5 | 15.6  | 0 | 0 | 0 | 1 | 1 | 2 |
| 36 | FXR_51 | -41.5 | -36.4 | -5.0  | 0 | 0 | 0 | 1 | 0 | 1 |
| 37 | FXR_30 | -42.8 | -41.3 | -1.5  | 0 | 0 | 0 | 1 | 1 | 2 |
| 38 | FXR_37 | -30.0 | -35.0 | 5.0   | 0 | 0 | 0 | 0 | 0 | 0 |
| 39 | FXR_6  | -45.1 | -35.5 | -9.6  | 0 | 0 | 0 | 1 | 1 | 2 |
| 40 | FXR_9  | -33.4 | -37.3 | 3.8   | 0 | 0 | 0 | 1 | 0 | 1 |
| 41 | FXR_13 | -47.3 | -49.6 | 2.3   | 0 | 0 | 0 | 1 | 1 | 2 |
| 42 | FXR_39 | -43.4 | -36.4 | -7.1  | 0 | 0 | 0 | 0 | 0 | 0 |

|               |    |         |       |       |       |   |   |   |   |   |   |
|---------------|----|---------|-------|-------|-------|---|---|---|---|---|---|
|               | 43 | FXR_40  | -32.5 | -43.2 | 10.7  | 0 | 0 | 0 | 1 | 0 | 1 |
|               | 44 | FXR_8   | -33.9 | -42.1 | 8.2   | 0 | 0 | 0 | 1 | 0 | 1 |
|               | 45 | FXR_7   | -41.6 | -43.1 | 1.5   | 0 | 0 | 0 | 0 | 0 | 0 |
|               | 46 | FXR_14  | -47.9 | -37.4 | -10.5 | 0 | 0 | 0 | 1 | 0 | 1 |
| Isoxazole     | 1  | FXR_4   | -31.3 | -35.3 | 3.9   | 0 | 1 | 1 | 1 | 1 | 4 |
|               | 2  | FXR_23  | -37.7 | -36.2 | -1.5  | 0 | 1 | 0 | 1 | 1 | 3 |
|               | 3  | FXR_33  | -44.0 | -39.2 | -4.9  | 0 | 0 | 0 | 1 | 0 | 1 |
|               | 4  | FXR_65  | -42.2 | -37.2 | -5.0  | 0 | 0 | 0 | 1 | 0 | 1 |
| Sulfonamide   | 1  | FXR_90  | -24.8 | -43.2 | 18.4  | 0 | 1 | 0 | 1 | 0 | 2 |
|               | 2  | FXR_102 | -27.8 | -43.6 | 15.8  | 0 | 0 | 0 | 1 | 1 | 2 |
|               | 3  | FXR_15  | -28.0 | -43.5 | 15.4  | 0 | 1 | 0 | 0 | 1 | 2 |
| Spiro         | 1  | FXR_81  | -33.8 | -42.0 | 8.3   | 0 | 1 | 0 | 1 | 0 | 2 |
| Miscellaneous | 1  | FXR_1   | -26.2 | -41.5 | 15.3  | 0 | 1 | 0 | 1 | 0 | 2 |
|               | 2  | FXR_2   | -36.6 | -36.6 | 0.0   | 0 | 1 | 1 | 1 | 1 | 4 |
|               | 3  | FXR_3   | -22.3 | -34.3 | 12.0  | 0 | 1 | 1 | 1 | 1 | 4 |
|               | 4  | FXR_5   | -35.4 | -37.6 | 2.2   | 0 | 1 | 0 | 1 | 0 | 2 |
|               | 5  | FXR_18  | -33.4 | -33.0 | -0.4  | 0 | 1 | 0 | 1 | 1 | 3 |
|               | 6  | FXR_34  | -48.4 | -37.0 | -11.4 | 0 | 1 | 0 | 0 | 1 | 2 |

|   | Compound class | ID | ChEMBL ID     | Structure                                                                            |
|---|----------------|----|---------------|--------------------------------------------------------------------------------------|
| 1 | Benzimidazole  | 1  | CHEMBL1642356 | 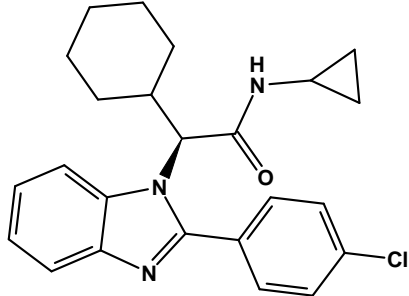   |
| 2 | Benzimidazole  | 2  | CHEMBL1642359 |    |
| 3 | Benzimidazole  | 3  | CHEMBL1642358 |   |
| 4 | Benzimidazole  | 4  | CHEMBL1642346 |  |
| 5 | Benzimidazole  | 5  | CHEMBL1642350 |  |

|    | Compound class | ID | ChEMBL ID     | Structure                                                                            |
|----|----------------|----|---------------|--------------------------------------------------------------------------------------|
| 6  | Benzimidazole  | 6  | CHEMBL1642354 | 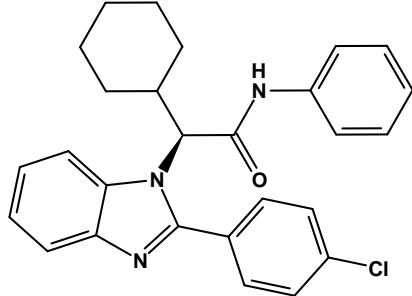   |
| 7  | Benzimidazole  | 7  | CHEMBL1642347 |    |
| 8  | Benzimidazole  | 8  | CHEMBL1668262 |   |
| 9  | Benzimidazole  | 9  | CHEMBL1668242 |  |
| 10 | Benzimidazole  | 10 | CHEMBL1668247 |  |



|    | Compound class | ID | ChEMBL ID     | Structure                                                                            |
|----|----------------|----|---------------|--------------------------------------------------------------------------------------|
| 11 | Benzimidazole  | 11 | CHEMBL1668256 | 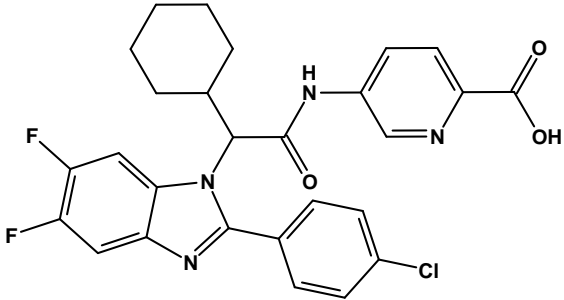   |
| 12 | Benzimidazole  | 12 | CHEMBL1668254 |    |
| 13 | Benzimidazole  | 13 | CHEMBL1668253 |   |
| 14 | Benzimidazole  | 14 | CHEMBL1668240 |  |
| 15 | Benzimidazole  | 15 | CHEMBL1668244 |  |

|    | Compound class | ID | ChEMBL ID     | Structure                                                                            |
|----|----------------|----|---------------|--------------------------------------------------------------------------------------|
| 16 | Benzimidazole  | 16 | CHEMBL1668259 | 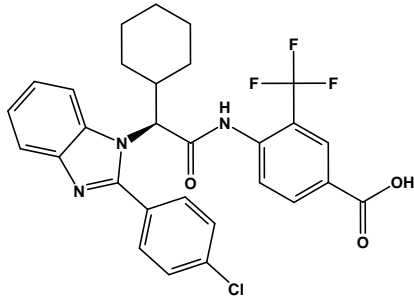   |
| 17 | Benzimidazole  | 17 | CHEMBL1668258 |    |
| 18 | Benzimidazole  | 18 | CHEMBL1615154 |   |
| 19 | Benzimidazole  | 19 | CHEMBL1668248 |  |
| 20 | Benzimidazole  | 20 | CHEMBL1668245 |  |

|    | Compound class | ID | ChEMBL ID     | Structure                                                                            |
|----|----------------|----|---------------|--------------------------------------------------------------------------------------|
| 21 | Benzimidazole  | 21 | CHEMBL1668260 | 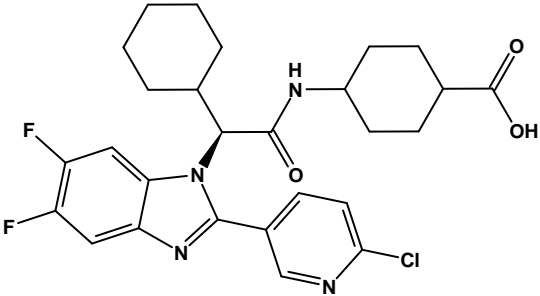   |
| 22 | Benzimidazole  | 22 | CHEMBL1668261 |    |
| 23 | Isoxazole      | 1  | CHEMBL511389  |   |
| 24 | Isoxazole      | 2  | CHEMBL511559  |  |
| 25 | Isoxazole      | 3  | CHEMBL466880  |  |

|    | Compound class | ID | ChEMBL ID    | Structure                                                                            |
|----|----------------|----|--------------|--------------------------------------------------------------------------------------|
| 26 | Isoxazole      | 4  | CHEMBL466471 | 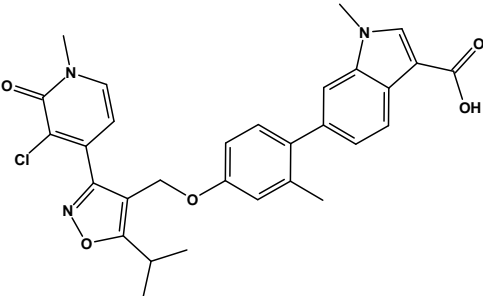   |
| 27 | Isoxazole      | 5  | CHEMBL513149 |    |
| 28 | Isoxazole      | 6  | CHEMBL466523 |   |
| 29 | Isoxazole      | 7  | CHEMBL466323 |  |
| 30 | Isoxazole      | 8  | CHEMBL466887 |  |

|    | Compound class | ID | ChEMBL ID     | Structure                                                                            |
|----|----------------|----|---------------|--------------------------------------------------------------------------------------|
| 31 | Isoxazole      | 9  | CHEMBL466318  | 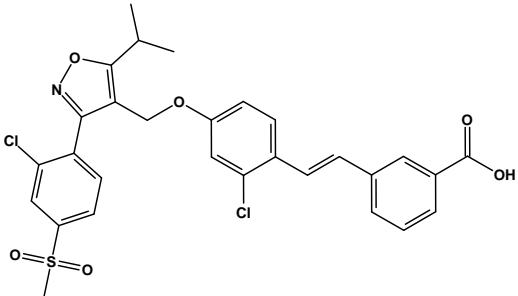   |
| 32 | Isoxazole      | 10 | CHEMBL469135  |    |
| 33 | Isoxazole      | 11 | CHEMBL466315  |   |
| 34 | Sulfonamide    | 1  | CHEMBL1367639 |  |
| 35 | Sulfonamide    | 2  | CHEMBL3264627 |  |

|    | Compound class | ID | ChEMBL ID     | Structure                                                                            |
|----|----------------|----|---------------|--------------------------------------------------------------------------------------|
| 36 | Sulfonamide    | 3  | CHEMBL3264635 | 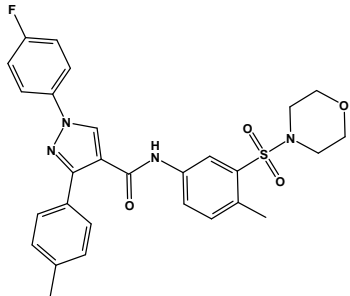   |
| 37 | Sulfonamide    | 4  | CHEMBL3264639 |    |
| 38 | Sulfonamide    | 5  | CHEMBL3264640 |   |
| 39 | Sulfonamide    | 6  | CHEMBL3264642 |  |
| 40 | Sulfonamide    | 7  | CHEMBL3264644 |  |

|    | Compound class | ID | ChEMBL ID     | Structure                                                                            |
|----|----------------|----|---------------|--------------------------------------------------------------------------------------|
| 41 | Sulfonamide    | 8  | CHEMBL3264645 | 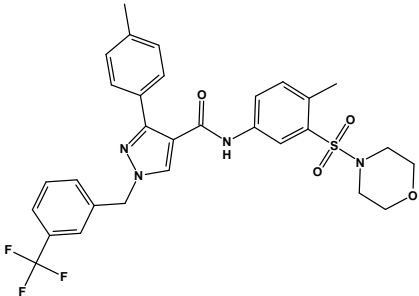   |
| 42 | Sulfonamide    | 9  | CHEMBL3264646 |    |
| 43 | Sulfonamide    | 10 | CHEMBL3264648 |   |
| 44 | Sulfonamide    | 11 | CHEMBL3264650 |  |
| 45 | Sulfonamide    | 12 | CHEMBL3264651 |  |

|    | Compound class | ID | ChEMBL ID     | Structure                                                                                                                                                                                                                                                                                                                                                                                                                                                                                                                                                                                                                                  |
|----|----------------|----|---------------|--------------------------------------------------------------------------------------------------------------------------------------------------------------------------------------------------------------------------------------------------------------------------------------------------------------------------------------------------------------------------------------------------------------------------------------------------------------------------------------------------------------------------------------------------------------------------------------------------------------------------------------------|
| 46 | Sulfonamide    | 13 | CHEMBL3264987 | 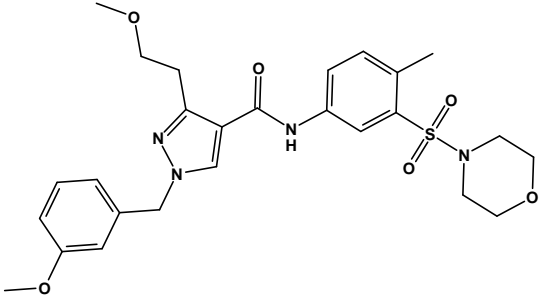 <p>The chemical structure of CHEMBL3264987 is a sulfonamide derivative. It features a central imidazole ring. One nitrogen of the imidazole is substituted with a (4-methoxyphenyl)methyl group. The other nitrogen is substituted with a (2-methoxyethyl) group. The 2-position of the imidazole ring is substituted with a sulfonamide group (-NH-C(=O)-). The sulfonamide nitrogen is further substituted with a 4-methylphenyl group. The sulfonamide sulfur atom is double-bonded to two oxygen atoms and is also bonded to a morpholine ring.</p> |



|   | Compound class | ID | ChEMBLID      | Structure                                                                            |
|---|----------------|----|---------------|--------------------------------------------------------------------------------------|
| 1 | Benzimidazole  | 1  | CHEMBL1642355 | 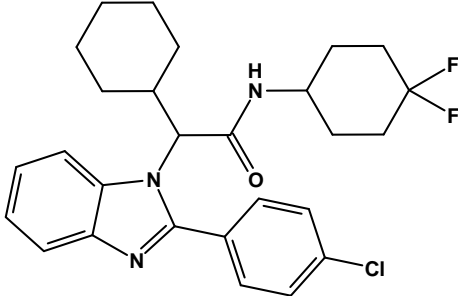   |
| 2 | Benzimidazole  | 2  | CHEMBL1642360 |    |
| 3 | Benzimidazole  | 3  | CHEMBL1642361 |   |
| 4 | Benzimidazole  | 4  | CHEMBL1642351 |  |
| 5 | Benzimidazole  | 5  | CHEMBL1642353 |  |

|    | Compound class | ID | ChEMBLID      | Structure                                                                            |
|----|----------------|----|---------------|--------------------------------------------------------------------------------------|
| 6  | Benzimidazole  | 6  | CHEMBL1642357 | 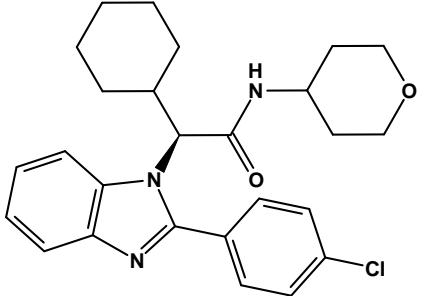   |
| 7  | Benzimidazole  | 7  | CHEMBL1642349 |    |
| 8  | Benzimidazole  | 8  | CHEMBL1642348 |   |
| 9  | Benzimidazole  | 9  | CHEMBL1642362 |  |
| 10 | Benzimidazole  | 10 | CHEMBL1668243 |  |

|    | Compound class | ID | ChEMBLID      | Structure                                                                            |
|----|----------------|----|---------------|--------------------------------------------------------------------------------------|
| 11 | Benzimidazole  | 11 | CHEMBL1668241 | 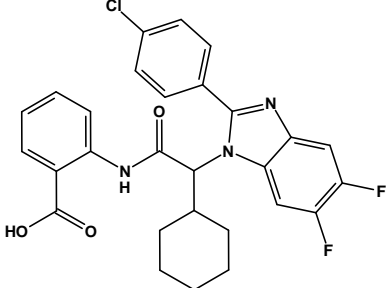   |
| 12 | Benzimidazole  | 12 | CHEMBL1668246 |    |
| 13 | Benzimidazole  | 13 | CHEMBL1668255 |   |
| 14 | Benzimidazole  | 14 | CHEMBL1668251 |  |
| 15 | Benzimidazole  | 15 | CHEMBL1668239 |  |

|    | Compound class | ID | ChEMBLID      | Structure                                                                            |
|----|----------------|----|---------------|--------------------------------------------------------------------------------------|
| 16 | Benzimidazole  | 16 | CHEMBL1668238 | 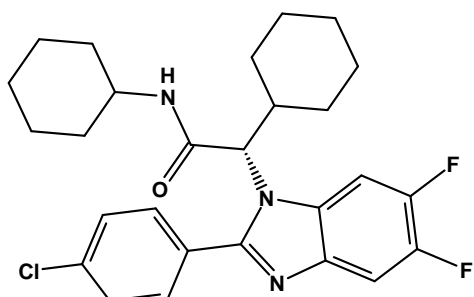   |
| 17 | Benzimidazole  | 17 | CHEMBL1668250 |    |
| 18 | Benzimidazole  | 18 | CHEMBL1615150 |   |
| 19 | Benzimidazole  | 19 | CHEMBL1668257 |  |
| 20 | Benzimidazole  | 20 | CHEMBL1615152 |  |

|    | Compound class | ID | ChEMBLID      | Structure                                                                            |
|----|----------------|----|---------------|--------------------------------------------------------------------------------------|
| 21 | Benzimidazole  | 21 | CHEMBL1668249 | 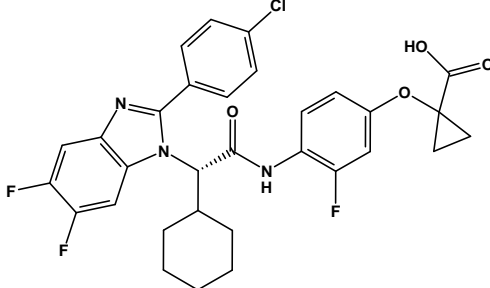   |
| 22 | Benzimidazole  | 22 | CHEMBL1615153 |    |
| 23 | Benzimidazole  | 23 | CHEMBL1668252 |   |
| 24 | Sulfonamide    | 1  | CHEMBL3264637 |  |
| 25 | Sulfonamide    | 2  | CHEMBL3264638 |  |

|    | Compound class | ID | ChEMBLID      | Structure                                                                                                                                                             |
|----|----------------|----|---------------|-----------------------------------------------------------------------------------------------------------------------------------------------------------------------|
| 26 | Sulfonamide    | 3  | CHEMBL3264641 | 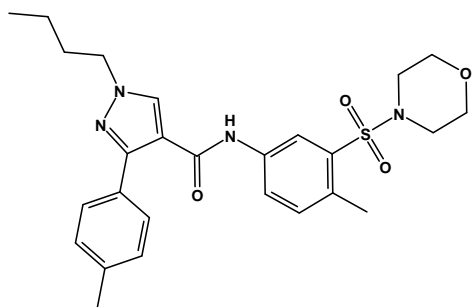 <chem>CCCCN1C=CC(C1)C(=O)Nc2ccc(C)c(S(=O)(=O)N3CCOCC3)c2</chem>                    |
| 27 | Sulfonamide    | 4  | CHEMBL3264643 |  <chem>CC1CC1CN(C1=CC=C(C=C1)C)C(=O)Nc2ccc(C)c(S(=O)(=O)N3CCOCC3)c2</chem>          |
| 28 | Sulfonamide    | 5  | CHEMBL3264647 |  <chem>CC(C)C1=CN(C1)CN(C1=CC=C(C=C1)C)C(=O)Nc2ccc(C)c(S(=O)(=O)N3CCOCC3)c2</chem> |
| 29 | Sulfonamide    | 6  | CHEMBL3264649 |  <chem>COc1ccc(cc1)CN(C1=CC=C(C=C1)C)C(=O)Nc2ccc(C)c(S(=O)(=O)N3CCOCC3)c2</chem>  |
| 30 | Sulfonamide    | 7  | CHEMBL3264988 |  <chem>CC(C)N1C=CC(C1)C(=O)Nc2ccc(C)c(S(=O)(=O)N3CCOCC3)c2</chem>                 |

|   | Compound class | ID | FXR ID | Structure                                                                            |
|---|----------------|----|--------|--------------------------------------------------------------------------------------|
| 1 | Benzimidazole  | 1  | FXR_19 | 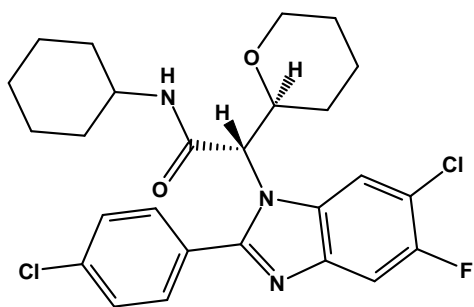   |
| 2 | Benzimidazole  | 2  | FXR_27 |    |
| 3 | Benzimidazole  | 3  | FXR_62 |   |
| 4 | Benzimidazole  | 4  | FXR_60 |  |
| 5 | Benzimidazole  | 5  | FXR_52 |  |

|    | Compound class | ID | FXR ID | Structure                                                                            |
|----|----------------|----|--------|--------------------------------------------------------------------------------------|
| 6  | Benzimidazole  | 6  | FXR_20 | 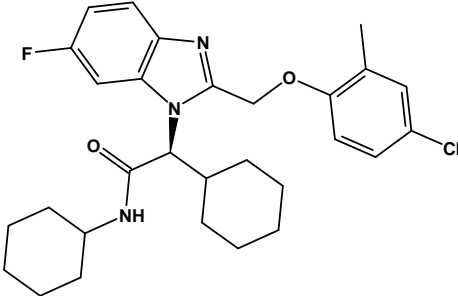   |
| 7  | Benzimidazole  | 7  | FXR_50 |    |
| 8  | Benzimidazole  | 8  | FXR_25 |   |
| 9  | Benzimidazole  | 9  | FXR_58 |  |
| 10 | Benzimidazole  | 10 | FXR_72 |  |



|    | Compound class | ID | FXR ID | Structure                                                                            |
|----|----------------|----|--------|--------------------------------------------------------------------------------------|
| 11 | Benzimidazole  | 11 | FXR_24 | 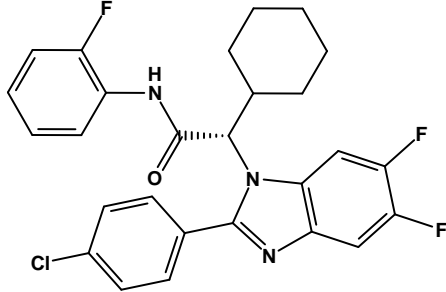   |
| 12 | Benzimidazole  | 12 | FXR_56 |    |
| 13 | Benzimidazole  | 13 | FXR_53 |   |
| 14 | Benzimidazole  | 14 | FXR_59 |  |
| 15 | Benzimidazole  | 15 | FXR_21 |  |

|    | Compound class | ID | FXR ID | Structure                                                                            |
|----|----------------|----|--------|--------------------------------------------------------------------------------------|
| 16 | Benzimidazole  | 16 | FXR_54 | 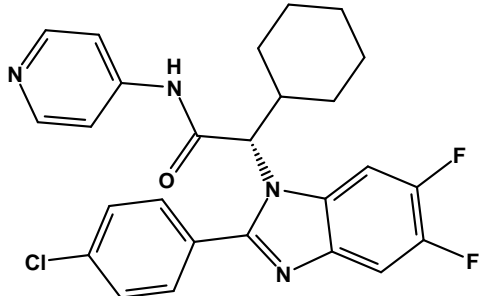   |
| 17 | Benzimidazole  | 17 | FXR_61 |    |
| 18 | Benzimidazole  | 18 | FXR_28 |   |
| 19 | Benzimidazole  | 19 | FXR_29 |  |
| 20 | Benzimidazole  | 20 | FXR_71 |  |

|    | Compound class | ID | FXR ID | Structure                                                                            |
|----|----------------|----|--------|--------------------------------------------------------------------------------------|
| 21 | Benzimidazole  | 21 | FXR_42 | 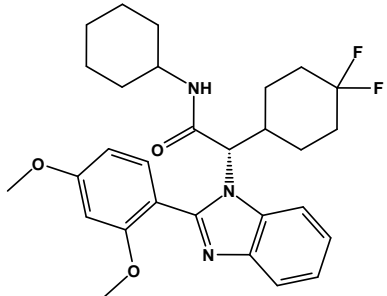   |
| 22 | Benzimidazole  | 22 | FXR_32 |    |
| 23 | Benzimidazole  | 23 | FXR_22 |   |
| 24 | Benzimidazole  | 24 | FXR_64 |  |
| 25 | Benzimidazole  | 25 | FXR_68 |  |

|    | Compound class | ID | FXR ID | Structure                                                                            |
|----|----------------|----|--------|--------------------------------------------------------------------------------------|
| 26 | Benzimidazole  | 26 | FXR_69 | 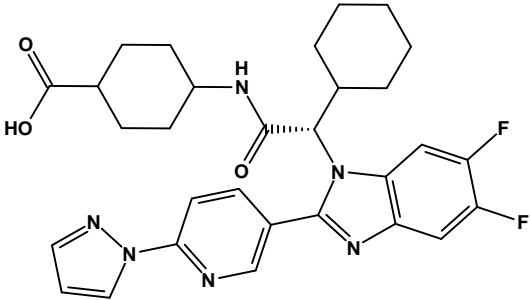   |
| 27 | Benzimidazole  | 27 | FXR_66 |    |
| 28 | Benzimidazole  | 28 | FXR_67 |   |
| 29 | Benzimidazole  | 29 | FXR_31 |  |
| 30 | Benzimidazole  | 30 | FXR_57 |  |

|    | Compound class | ID | FXR ID | Structure                                                                            |
|----|----------------|----|--------|--------------------------------------------------------------------------------------|
| 31 | Benzimidazole  | 31 | FXR_55 | 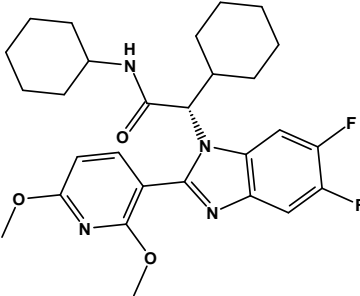   |
| 32 | Benzimidazole  | 32 | FXR_26 |    |
| 33 | Benzimidazole  | 33 | FXR_70 |   |
| 34 | Benzimidazole  | 34 | FXR_36 |  |
| 35 | Benzimidazole  | 35 | FXR_63 |  |

|    | Compound class | ID | FXR ID | Structure                                                                            |
|----|----------------|----|--------|--------------------------------------------------------------------------------------|
| 36 | Benzimidazole  | 36 | FXR_51 | 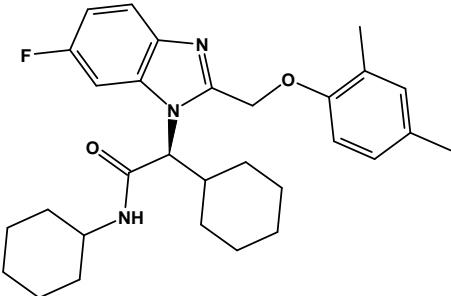   |
| 37 | Benzimidazole  | 37 | FXR_30 |    |
| 38 | Benzimidazole  | 38 | FXR_37 |   |
| 39 | Benzimidazole  | 39 | FXR_6  |  |
| 40 | Benzimidazole  | 40 | FXR_9  |  |

|    | Compound class | ID | FXR ID | Structure                                                                                                                                                  |
|----|----------------|----|--------|------------------------------------------------------------------------------------------------------------------------------------------------------------|
| 41 | Benzimidazole  | 41 | FXR_13 | 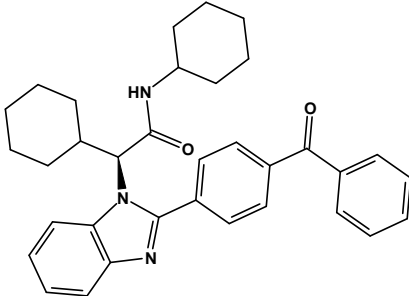 <chem>O=C(c1ccccc1)c2ccc(cc2)C3=C(N4CCCCC4)C5=CC=CC=C5N3C6CCCCC6</chem> |
| 42 | Benzimidazole  | 42 | FXR_39 |  <chem>CCc1ccc(cc1)C2=C(N3CCCCC3)C4=CC=CC=C4N2C5CCCCC5</chem>            |
| 43 | Benzimidazole  | 43 | FXR_40 |  <chem>OC(=O)CCc1ccc(cc1)C2=C(N3CCCCC3)C4=CC=CC=C4N2C5CCCCC5</chem>     |
| 44 | Benzimidazole  | 44 | FXR_8  |  <chem>OCc1ccc(cc1)C2=C(N3CCCCC3)C4=CC=CC=C4N2C5CCCCC5</chem>          |
| 45 | Benzimidazole  | 45 | FXR_7  |  <chem>c1ccc(cc1)c2sc(C3=C(N4CCCCC4)C5=CC=CC=C5N3)cc2</chem>           |

|    | Compound class | ID | FXR ID | Structure                                                                            |
|----|----------------|----|--------|--------------------------------------------------------------------------------------|
| 46 | Benzimidazole  | 46 | FXR_14 | 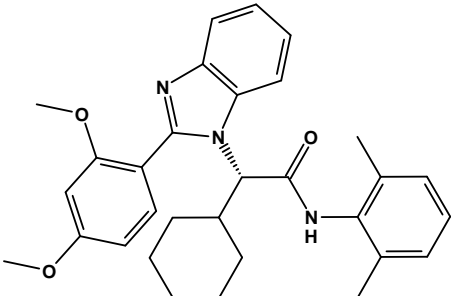   |
| 47 | Isoxazole      | 1  | FXR_4  |    |
| 48 | Isoxazole      | 2  | FXR_23 |   |
| 49 | Isoxazole      | 3  | FXR_33 |  |
| 50 | Isoxazole      | 4  | FXR_65 |  |



|    | Compound class | ID | FXR ID  | Structure                                                                            |
|----|----------------|----|---------|--------------------------------------------------------------------------------------|
| 51 | Sulfonamide    | 1  | FXR_90  | 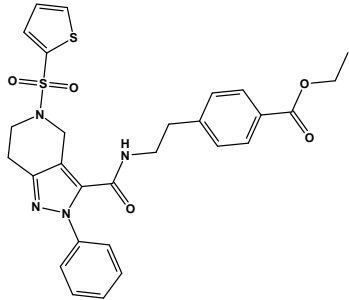   |
| 52 | Sulfonamide    | 2  | FXR_102 |    |
| 53 | Sulfonamide    | 3  | FXR_15  |   |
| 54 | Spiro          | 1  | FXR_81  |  |
| 55 | Miscellaneous  | 1  | FXR_1   |  |

|    | Compound class | ID | FXR ID | Structure                                                                            |
|----|----------------|----|--------|--------------------------------------------------------------------------------------|
| 56 | Miscellaneous  | 2  | FXR_2  | 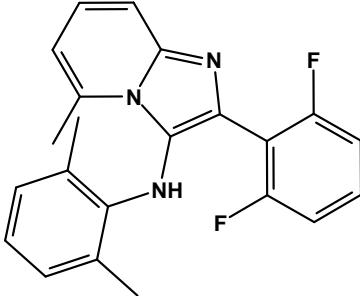   |
| 57 | Miscellaneous  | 3  | FXR_3  |    |
| 58 | Miscellaneous  | 4  | FXR_5  |   |
| 59 | Miscellaneous  | 5  | FXR_18 |  |
| 60 | Miscellaneous  | 6  | FXR_34 |  |
